# Supplementary material for: Oncological big data platforms for promoting digital competencies and professionalism in Chinese medical students: a cross-sectional study
Source: PubMed Central journal article supplement — BMJ Open. 2022 Sep 14;12(9):e061015. doi: 10.1136/bmjopen-2022-061015 (PMC9478867; doi:10.1136/bmjopen-2022-061015), 2022-09-14
Supplement: bmjopen-2022-061015supp001.pdf [file bmjopen-2022-061015supp001.pdf]

## Supplemental tables

Table S1, basic knowledge for big data platform before and after the workshop.

| Items                                                    | Before Workshop |       | After Workshop |       | <i>P</i> |
|----------------------------------------------------------|-----------------|-------|----------------|-------|----------|
|                                                          | YES, n          | NO, n | YES, n         | NO, n |          |
| I know the content of big data platform                  | 74              | 200   | 253            | 21    | <0.0001  |
| I know the potential applications of big data technology | 174             | 100   | 253            | 21    | <0.0001  |
| Big data technology is practical in medical education    | 233             | 41    | 271            | 3     | <0.0001  |
| Big data technology is practical in clinical practice    | 211             | 63    | 238            | 36    | 0.0039   |
| Big data technology is practical in scientific research  | 224             | 50    | 261            | 13    | <0.0001  |

Table S2, students' attitude towards big data platform before and after the workshop.

| Items                                                     | Before Workshop     |             |          |                  |      |       | After Workshop      |             |          |                  |      |       | <i>P</i> |
|-----------------------------------------------------------|---------------------|-------------|----------|------------------|------|-------|---------------------|-------------|----------|------------------|------|-------|----------|
|                                                           | Totally disagree, n | Disagree, n | Agree, n | Totally agree, n | Mean | SD    | Totally disagree, n | Disagree, n | Agree, n | Totally agree, n | Mean | SD    |          |
| Big data platform could assist future medical education   | 21                  | 16          | 53       | 184              | 3.50 | 0.910 | 4                   | 7           | 10       | 253              | 3.87 | 0.504 | 0.0002   |
| Big data platform could assist future scientific research | 11                  | 7           | 75       | 181              | 3.55 | 0.735 | 5                   | 3           | 16       | 250              | 3.86 | 0.499 | 0.0705   |
| Big data platform could assist future clinical practice   | 13                  | 14          | 72       | 175              | 3.49 | 0.799 | 2                   | 6           | 23       | 243              | 3.85 | 0.464 | 0.0017   |
| I am willing to learn how to use big data platform        | 13                  | 11          | 93       | 157              | 3.43 | 0.783 | 0                   | 0           | 0        | 274              | 4    | 0     | <0.0001  |

|                                                                |    |    |     |     |      |       |    |    |    |     |      |       |         |
|----------------------------------------------------------------|----|----|-----|-----|------|-------|----|----|----|-----|------|-------|---------|
| I am willing to use big data platform in the future            | 23 | 33 | 84  | 134 | 3.20 | 0.953 | 0  | 0  | 0  | 274 | 4    | 0     | <0.0001 |
| I am willing to recommended big data platform to my colleagues | 14 | 58 | 65  | 137 | 3.19 | 0.941 | 2  | 2  | 18 | 252 | 3.90 | 0.388 | <0.0001 |
| Big data platform could benefit my career                      | 12 | 14 | 142 | 106 | 3.25 | 0.744 | 7  | 27 | 54 | 186 | 3.53 | 0.776 | 0.3382  |
| Big data platform could benefit all medical careers            | 50 | 96 | 74  | 54  | 2.48 | 1.006 | 12 | 36 | 79 | 147 | 3.32 | 0.863 | <0.0001 |

SD, Standard Deviation.

Table S3, the professionalism for students before and after the workshop.

| Items                                       | Before workshop         |                  |              |                   | After workshop          |                  |              |                   | P       |  |
|---------------------------------------------|-------------------------|------------------|--------------|-------------------|-------------------------|------------------|--------------|-------------------|---------|--|
|                                             | Not at all important, n | Not important, n | Important, n | Very important, n | Not at all important, n | Not important, n | Important, n | Very important, n |         |  |
| Doctor-patient relationship skills          |                         |                  |              |                   |                         |                  |              |                   |         |  |
| Listen actively to patient                  | 19                      | 11               | 24           | 220               | 0                       | 0                | 1            | 273               | <0.0001 |  |
| Show interest in patient as a person        | 11                      | 8                | 37           | 218               | 2                       | 2                | 6            | 264               | 0.0029  |  |
| Show respect for patient                    | 3                       | 3                | 12           | 256               | 0                       | 0                | 1            | 273               | 0.0401  |  |
| Recognize and meet patient needs            | 5                       | 4                | 11           | 254               | 1                       | 0                | 2            | 271               | 0.0255  |  |
| Accepted inconvenience to meet patient need | 15                      | 11               | 35           | 213               | 10                      | 12               | 24           | 228               | 0.6503  |  |
| Ensure continuity of patient care           | 3                       | 4                | 47           | 220               | 1                       | 5                | 9            | 259               | 1       |  |

|                                                            |    |    |     |     |    |    |    |     |         |
|------------------------------------------------------------|----|----|-----|-----|----|----|----|-----|---------|
| Advocate on behalf of a patient and/or family member       | 6  | 7  | 70  | 191 | 0  | 0  | 5  | 269 | 0.0008  |
| Maintained appropriate boundaries with patients/colleagues | 10 | 6  | 14  | 244 | 5  | 3  | 16 | 250 | 0.1440  |
| Reflective skills                                          |    |    |     |     |    |    |    |     |         |
| Demonstrating awareness of limitations                     | 11 | 7  | 91  | 165 | 6  | 7  | 44 | 217 | 0.4595  |
| Admitting errors/omissions                                 | 16 | 18 | 90  | 150 | 8  | 13 | 44 | 209 | 0.0880  |
| Soliciting feedback                                        | 6  | 19 | 68  | 181 | 2  | 1  | 4  | 267 | <0.0001 |
| Accepting feedback                                         | 12 | 17 | 52  | 193 | 4  | 2  | 5  | 263 | 0.0001  |
| Maintaining composure in a difficult situation             | 6  | 8  | 9   | 251 | 1  | 3  | 0  | 270 | 0.0310  |
| Time management                                            |    |    |     |     |    |    |    |     |         |
| Was on time                                                | 7  | 9  | 20  | 238 | 5  | 8  | 15 | 246 | 0.7027  |
| Completing tasks in a reliable fashion                     | 5  | 6  | 1   | 262 | 1  | 0  | 0  | 273 | 0.0086  |
| Being available to patients or colleagues                  | 11 | 10 | 14  | 239 | 2  | 1  | 0  | 271 | 0.0004  |
| Interprofessional relationship skills                      |    |    |     |     |    |    |    |     |         |
| Maintaining appropriate appearance                         | 27 | 33 | 54  | 160 | 2  | 9  | 17 | 246 | <0.0001 |
| Addressing own gaps in knowledge and skills                | 7  | 0  | 9   | 258 | 0  | 0  | 2  | 272 | 0.0225  |
| Demonstrating respect for colleagues                       | 13 | 8  | 119 | 134 | 7  | 10 | 85 | 172 | 0.6139  |
| Avoiding derogatory language                               | 26 | 19 | 59  | 170 | 10 | 16 | 54 | 194 | 0.0220  |
| Assisting a colleague as needed                            | 7  | 5  | 124 | 138 | 3  | 11 | 61 | 199 | 0.8407  |

|                                               |    |    |    |     |    |    |    |     |                              |
|-----------------------------------------------|----|----|----|-----|----|----|----|-----|------------------------------|
| Maintaining patient confidentiality           | 21 | 45 | 71 | 137 | 3  | 12 | 13 | 246 | <i>&lt;0.000</i><br><i>1</i> |
| Using health resources appropriately          | 4  | 2  | 99 | 169 | 3  | 8  | 43 | 220 | <i>0.3244</i>                |
| Respecting rules and procedures of the system | 37 | 18 | 64 | 155 | 12 | 21 | 72 | 169 | <i>0.0146</i>                |
